# Supplementary material
Source: PubMed Central journal article supplement (PMC4597275)
Supplement: mmc2.pdf [file mmc2.pdf]

**A**

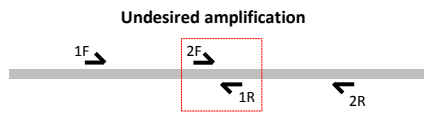

**Analysis of 111 primer pairs for 7 genes**

| Target                  | No. of amplicons | Size (bp) | %     |
|-------------------------|------------------|-----------|-------|
| Target                  | 111              | 140-203   | 48.1% |
| Undesired amplification | 70               | 25-139    | 30.3% |
|                         | 50               | 223-300   | 21.6% |

**Stratification according to In-Silico PCR analysis**

| Reaction A              |                  |           |       | Reaction B              |                  |           |       |
|-------------------------|------------------|-----------|-------|-------------------------|------------------|-----------|-------|
| Target                  | No. of amplicons | Size (bp) | %     | Target                  | No. of amplicons | Size (bp) | %     |
| Target                  | 55               | 148-211   | 66.3% | Target                  | 56               | 151-203   | 64.4% |
| Undesired amplification | 1                | 49        | 1.2%  | Undesired amplification | 1                | 25        | 1.1%  |
|                         | 27               | 328-598   | 32.5% | Undesired amplification | 30               | 362-599   | 34.5% |

**B**

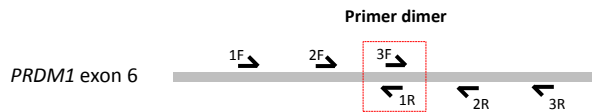

**Primer dimer**

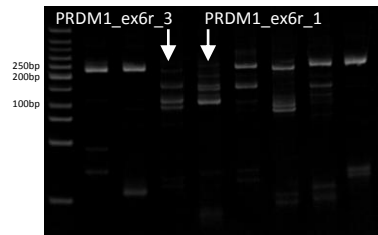

**AutoDimer analysis**

| Sequence lineup                             | Matches | Score |
|---------------------------------------------|---------|-------|
| PRDM1_ex6r_3F 3' -CATTGCTGGGCTCCCATCTTCC-5' | 22      | 22    |
| PRDM1_ex6r_1R 5' -GTAAACGACCCGAGGGTAGAAG-3' |         |       |

**Stratification according to AutoDimer analysis**

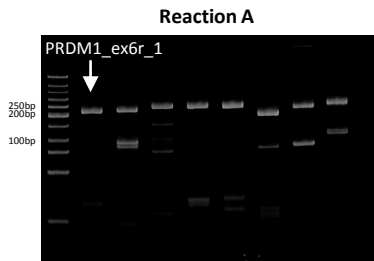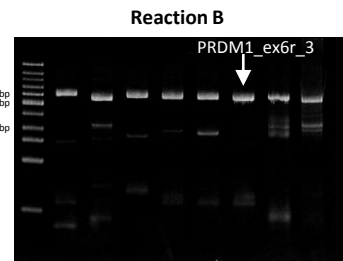

**Figure S2.**
