# Supplementary material
Source: PubMed Central journal article supplement (PMC4597275)

**A**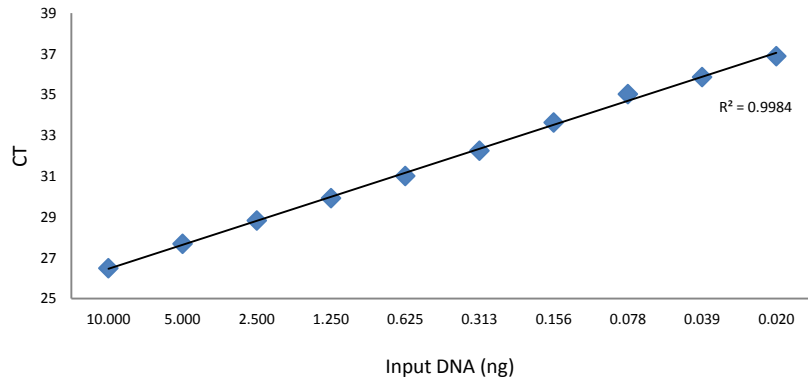**B**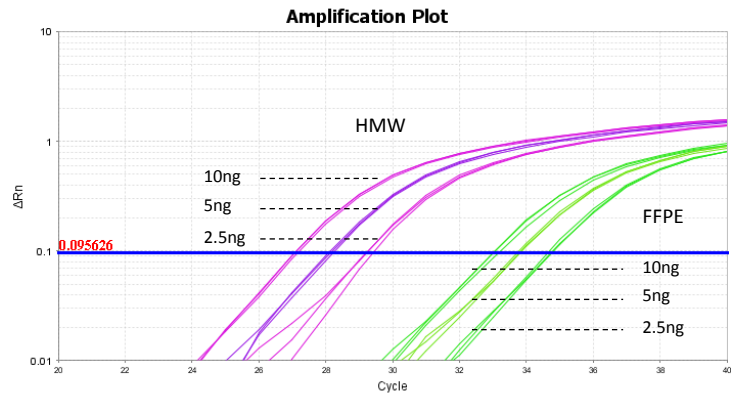**Figure S1.**

Supplement: mmc1.pdf [file mmc1.pdf]

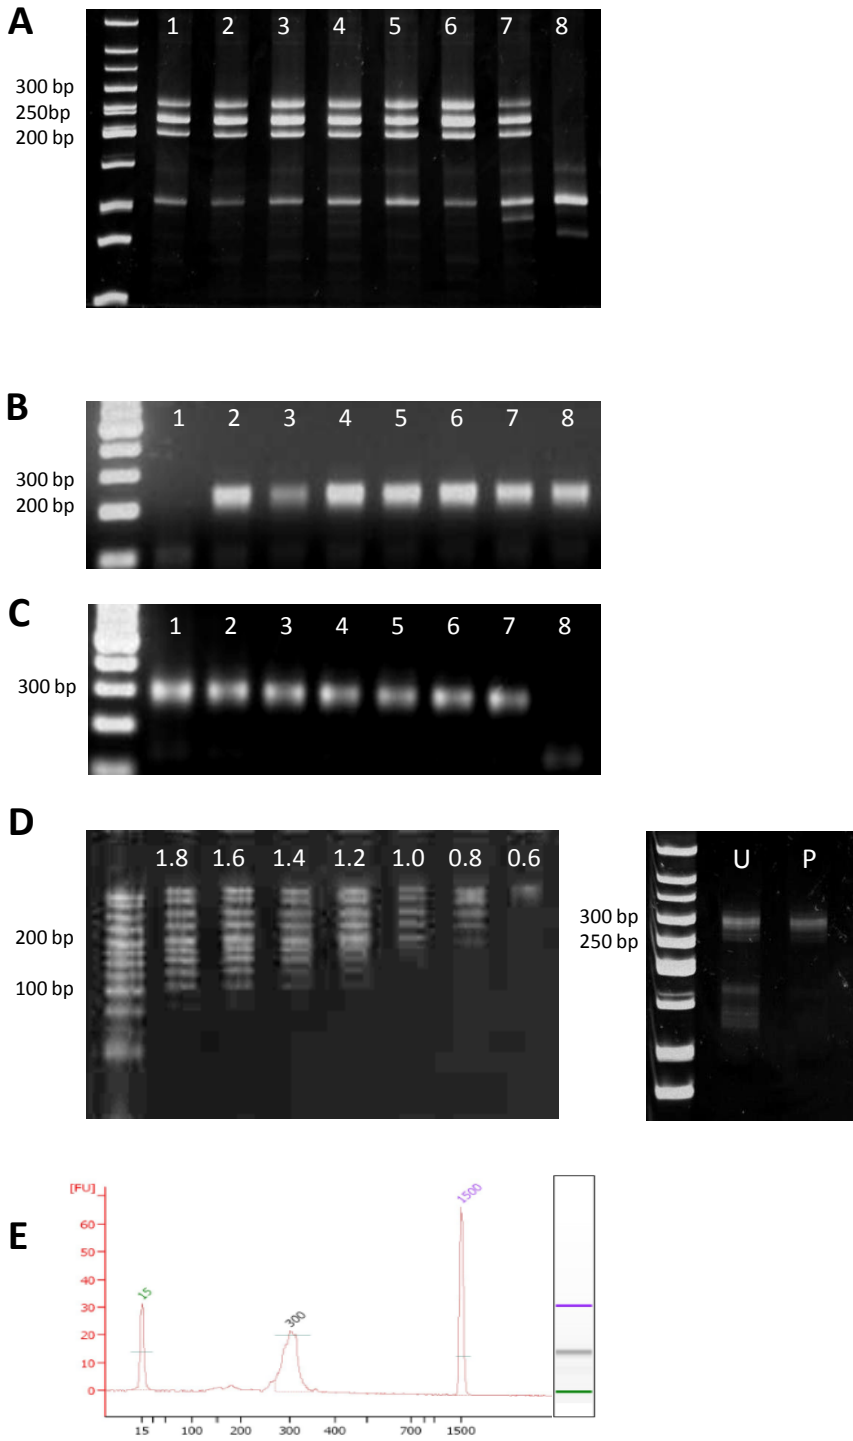

**Figure S3.**

Supplement: mmc3.pdf [file mmc3.pdf]

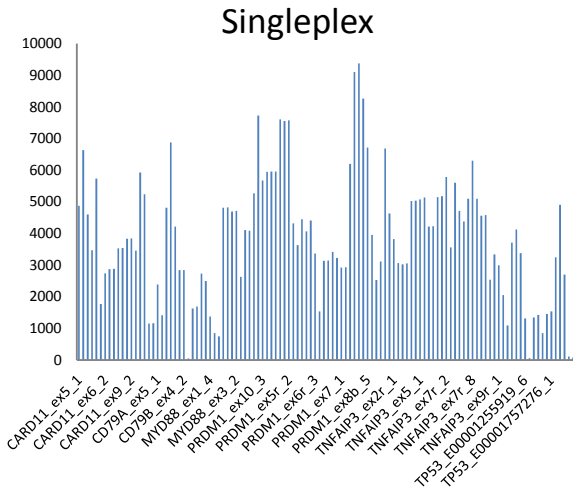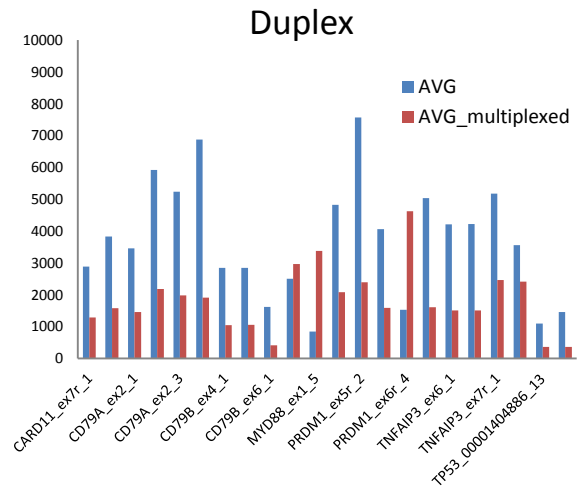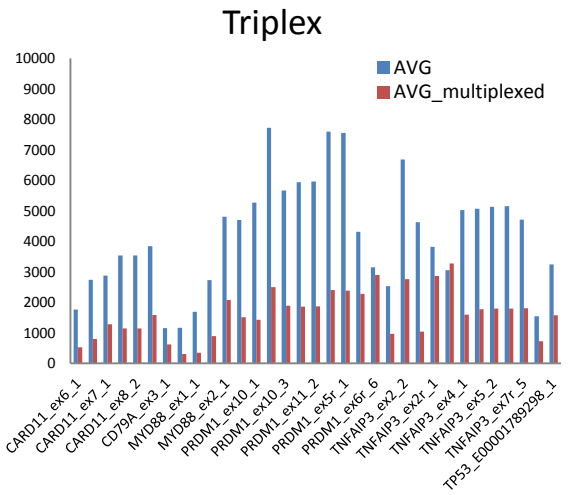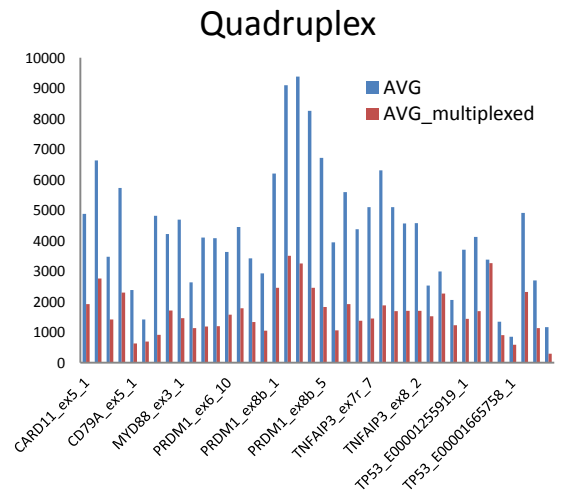

Figure S4.

Supplement: mmc4.pdf [file mmc4.pdf]

**Substitution:**  
 L0092  
*TNFAIP3*  
 c.589G>T

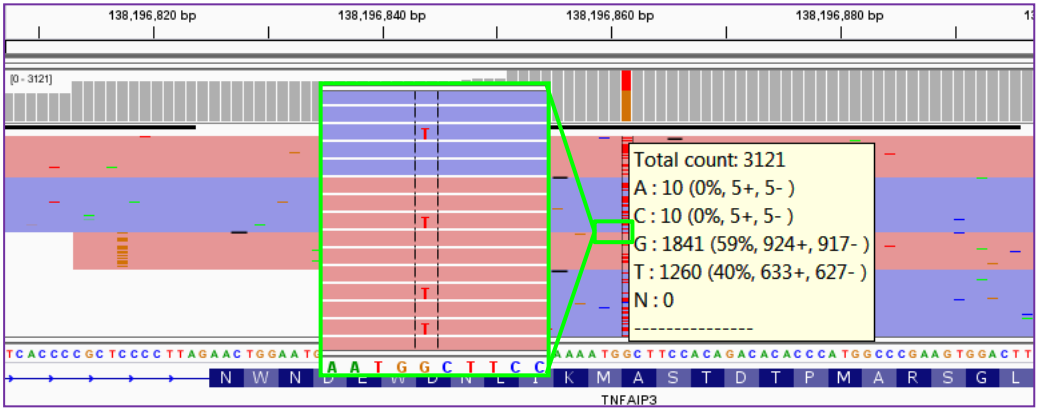

**Insertion:**  
 L0092  
*TNFAIP3*  
 c.923 T>TAA

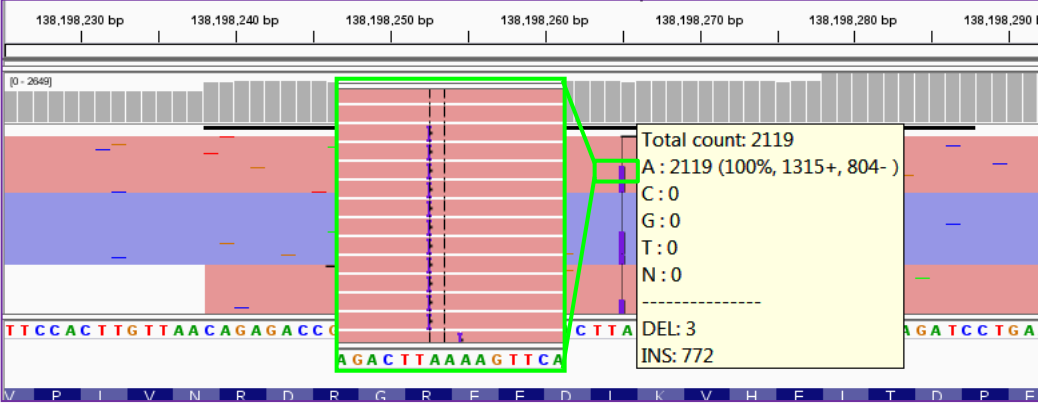

**Deletion:**  
 L0112  
*TNFAIP3*  
 c.973 TTAAA>T

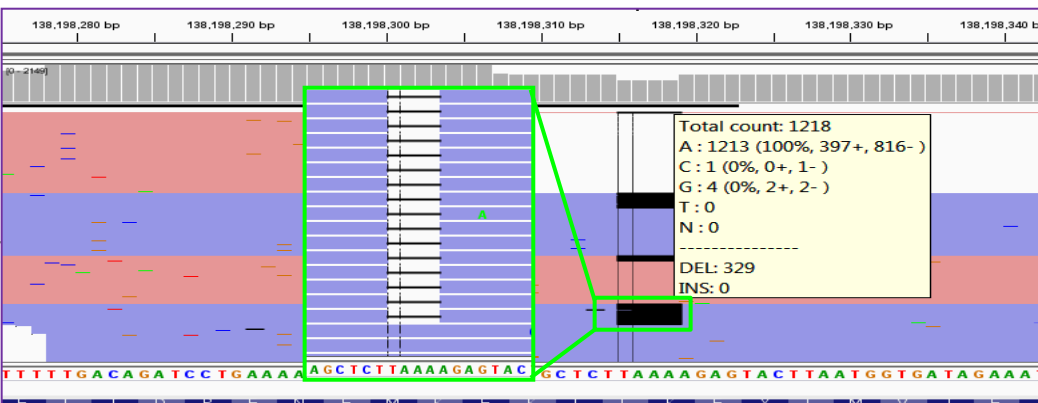

Figure S5.

Supplement: mmc5.pdf [file mmc5.pdf]

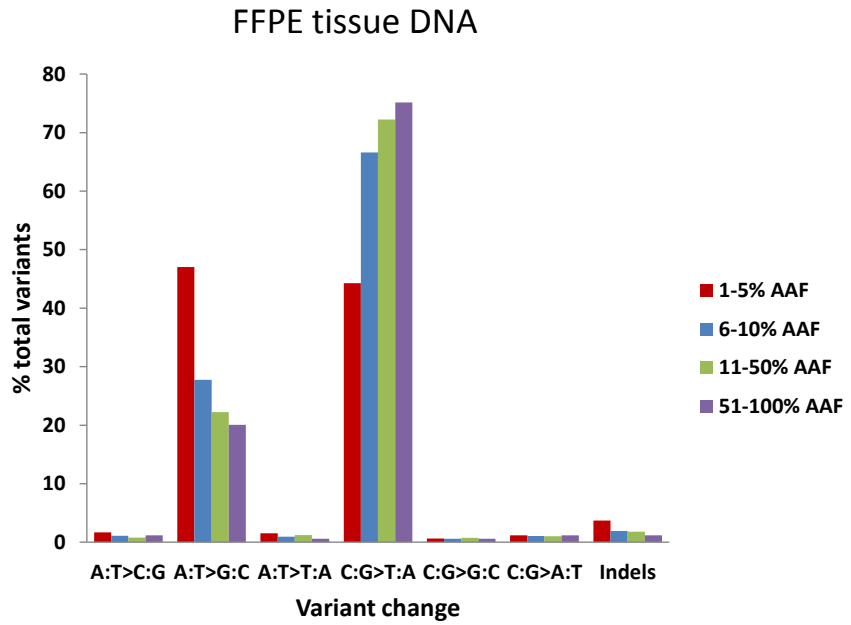

Figure S6.

Supplement: mmc6.pdf [file mmc6.pdf]
